# Supplementary material for: Burden of symptoms associated with development of metastatic bone disease in patients with breast cancer
Source: Springer Nature journal article supplement (doi:10.1007/s00520-016-3154-x), 2016-03-29
Supplement: MOESM1 [file 10019774]

SUPPLEMENTAL MATERIAL

Burden of Symptoms Associated With Development of Metastatic Bone Disease
in Patients With Breast Cancer

Running title (29 characters): Symptom burden of bone metastases

Charles Cleeland, PhD,1 Roger von Moos, MD,2 Mark S. Walker, PhD3 Yuanyuan Wang, PhD4 Jianqing Gao,MS,4 Mariana Chavez-MacGregor, MD, MSc1 Alexander Liede, MSc, PhD5 Jorge Arellano,MSc6 Arun Balakumaran, MD,6 Yi Qian, PhD6

1University of Texas, MD Anderson Cancer Center, Houston TX, 2Kantonsspital Graubünden, Chur, Switzerland, 3Vector Oncology, Memphis, TN, 4IMS Health, Plymouth Meeting, PA, 5Amgen Inc., South San Francisco, CA, 6Amgen Inc., Thousand Oaks, CA

Table S1. Number of Patients Evaluated for PCM Items in Figure 1.

| Month | Fatigue n | Physical Pain n | Anxious n | Trouble Sleeping n | Numbness/ tingling n | Loss of Interest in Others n |
| --- | --- | --- | --- | --- | --- | --- |
| -12 | 278 | 276 | 269 | 276 | 275 | 269 |
| -10 | 259 | 256 | 244 | 255 | 253 | 244 |
| -8 | 308 | 308 | 295 | 308 | 308 | 294 |
| -6 | 330 | 327 | 314 | 327 | 327 | 311 |
| -4 | 339 | 341 | 327 | 340 | 339 | 326 |
| -2 | 387 | 386 | 372 | 387 | 386 | 372 |
| 0 | 734 | 733 | 720 | 733 | 733 | 720 |
| 2 | 615 | 613 | 596 | 613 | 615 | 595 |
| 4 | 543 | 539 | 527 | 539 | 541 | 528 |
| 6 | 502 | 502 | 487 | 502 | 503 | 486 |
| 8 | 433 | 433 | 420 | 431 | 431 | 419 |
| 10 | 402 | 403 | 399 | 402 | 402 | 397 |
| 12 | 381 | 382 | 369 | 382 | 381 | 369 |
